# Supplementary material for: SAG1.3-derived Frizzled-targeting negative allosteric modulators
Source: Research Square preprint supplement (doi:10.21203/rs.3.rs-3910794/v1), 2024-02-19
Supplement: Supplementary file 1 [file c505bd9f6c49ac80b255c63b.xlsx]

## Sheet: compound_list
Compound list with results from 10 µM binding screen
measured on ClarioStar		donor only (ClarioStar)		-0.0273567
measured on TECAN Spark		donor only (TECAN Spark)		-0.03823
				net BRET FZD6		Displacement % FZD6
Number	Compound	Structure	@ 10 µM compound	SD	N	@ 10 µM compound
	SAG1.3		-0.009875	0.005121	8	0.360972
	SAG1.3		-0.01481	0.01483	3	0.387392
1	DD435401		-0.01604	0.00558	3	0.586329
2	DD434001		0.009552	0.005645	6	-0.349165
3	DD433701		0.003401	0.003067	6	-0.124321
4	DD433801		-0.005385	0.002358	6	0.196844
5	DD433901		-0.003768	0.003055	6	0.137736
6	DD434201		-0.00819	0.004765	6	0.299379
7	DD434401		-0.004558	0.005549	6	0.166614
8	MRG31		-0.01764	0.003829	6	0.644815
9	MRG32		-0.01973	0.003702	5	0.721214
10	MRG33		-0.02065	0.0009263	2	0.754843
11	DJ503701		-0.02275	0.004593	3	0.831607
12	DJ503801		-0.01589	0.008136	3	0.580846
13	DJ503901		-0.01186	0.006255	3	0.433532
14	DJ508501		-0.02902	0.006142	3	0.75909
15	DJ508401		-0.02679	0.005491	3	0.700759
16	DJ507701		-0.01961	0.005407	3	0.512948
17	DJ508701		-0.02812	0.003942	3	0.735548
18	DQ090601		-0.03101	0.00915	3	0.811143
19	DQ090801		-0.03349	0.01164	3	0.876014
20	DQ090501		-0.02067	0.002763	3	0.540675
21	DQ090001		-0.02989	0.005978	3	0.781847
22	DJ509801		-0.02624	0.00437	3	0.686372
23	DQ090901		-0.0328	0.006846	3	0.857965
24	DJ509001		-0.02984	0.01285	3	0.780539
25	DJ501501		0.01008	0.006382	3	-0.368466
26	DD436001		-0.0001163	0.002218	3	0.00425125
27	DD435701		-0.0007532	0.002357	3	0.0275326
28	DD435601		-0.003878	0.003461	3	0.141757
29	DD435801		-0.007891	0.002522	3	0.288449
30	DD435901		-0.00505	0.001721	3	0.184599
31	DD434901		0.001076	0.001351	3	-0.0393323
32	DD435201		-0.002142	0.004303	3	0.078299
33	DD435001		0.003518	0.003355	3	-0.128598
34	DD435101		-0.0004908	0.003616	3	0.0179408
35	DD438401		-0.0005497	0.00237	3	0.0200938
36	DD438701		-0.01779	0.004365	3	0.650299
37	DD438901		-0.01175	0.006054	3	0.429511
38	DD436501		-0.00322	0.003462	3	0.117704
39	DD436601		-0.0005097	0.003095	3	0.0186317
40	DD436701		-0.001753	0.003905	3	0.0640794
41	DD436801		-0.01749	-0.001892	3	0.639332
42	DJ502601		-0.008246	0.006238	3	0.301426
43	DD436901		-0.01224	0.004431	3	0.447423
44	DD439301		-0.009593	0.009168	3	0.350664
45	DD439401		-0.01175	0.008718	3	0.429511
46	DD439501		-0.01017	0.003167	3	0.371756
47	DD439901		-0.009667	0.003167	3	0.353369
48	DJ500001		-0.01164	0.002952	3	0.42549
49	DJ500101		-0.008953	0.003404	3	0.327269
50	DJ500301		-0.01274	0.008314	3	0.4657
51	DJ500201		-0.01277	0.002707	3	0.466797
52	MRG26		-0.01939	0.005906	7	0.708785
53	DJ500701		-0.008668	0.004885	3	0.316851
54	DJ500801		-0.00673	0.008789	3	0.24601
55	DJ502901		-0.01126	0.006216	3	0.4116
56	DJ503001		-0.004607	0.008961	3	0.168405
57	DJ503101		-0.01079	0.006009	3	0.394419
58	DJ503201		-0.01034	0.003722	3	0.37797
59	DJ503301		-0.008693	0.005511	3	0.317765
		0

## Sheet: Sheet1
Donor only, see prism-file for info
-0.02545	-0.02658	-0.02519	-0.03251
-0.02432	-0.02408	-0.02603	-0.03106
-0.03073	-0.02665	-0.02526	-0.03042
